# 1 Response of coral reef dinoflagellates to nanoplastics 2 under experimental conditions

3 Christina Ripken<sup>1,2,\*</sup>, Konstantin Khalturin<sup>2</sup> and Eiichi Shoguchi<sup>2</sup>

4

5 <sup>1</sup> Light-Matter Interactions for Quantum Technologies Unit, Okinawa Institute of Science and Technology  
6 Graduate University, Onna, Okinawa 904-0495, Japan

7 <sup>2</sup> Marine Genomics Unit, Okinawa Institute of Science and Technology Graduate University, Onna, Okinawa  
8 904-0495, Japan; eiichi@oist.jp (E.S.) and konstantin.khalturin@oist.jp (K.K.)

9 \* Correspondence: christina.ripken@oist.jp

10 Abstract: Plastic products contribute heavily to anthropogenic pollution of the oceans. Small plastic  
11 particles in the micro- and nanoscale ranges have been found in all marine ecosystems, but little is  
12 known about their effects upon marine organisms. In this study we examine changes in cell growth,  
13 aggregation, and gene expression of two symbiotic dinoflagellates of the family Symbiodiniaceae,  
14 *Symbiodinium tridacnidorum* (clade A3) and *Cladocopium* sp. (clade C), under exposure to 42-nm  
15 polystyrene beads. In laboratory experiments, cell number and aggregation were reduced after 10  
16 days of nanoplastic exposure at 0.01, 0.1, and 10 mg/L concentrations, but no clear correlation with  
17 plastic concentration was observed. Genes involved in dynein motor function were upregulated  
18 compared to control conditions, while genes related to photosynthesis, mitosis, and intracellular  
19 degradation were downregulated. Overall, nanoplastic exposure led to more genes being  
20 downregulated than upregulated and the number of genes with altered expression was larger in  
21 *Cladocopium* sp. than in *S. tridacnidorum*, suggesting different sensitivity to nanoplastic between  
22 species. Our data show that nanoplastic inhibits growth and alters aggregation properties of  
23 microalgae, which may negatively affect the uptake of these indispensable symbionts by coral reef  
24 organisms.

25 Keywords: Nanoplastics; Dinoflagellate; Coral reef

26

## 27 1. Introduction

28 Coral reefs provide habitat for marine invertebrate and vertebrate species alike, sustaining the  
29 highest biodiversity among marine ecosystems [1]. Formed primarily by scleractinian corals and  
30 coralline algae, coral reefs are complex and vulnerable ecosystems. Structural complexity of coral  
31 reefs, and by extension, the capability to sustain biodiversity often declines due to natural and human-  
32 related stressors [2,3].

33 One important stressor for coral reef ecosystems is plastic pollution. Small plastic particles (>1  
34 mm) have been reported from coral islands at more than 1000 items/m<sup>2</sup> [4]. Further fragmentation of  
35 these particles leads to nanoplastics (<1 μm) [5]. Microplastic particles induce stress responses in  
36 scleractinian corals, suppress their immune systems and capacity to cope with environmental toxins  
37 [6]. When ingested by corals [7,8,9], microplastics disrupt the anthozoan-algal symbiotic relationship  
38 [10]. They are also linked to potential adverse effects on calcification [11] with exposure resulting in  
39 attachment of microplastic particles to tentacles or mesenterial filaments, ingestion of microplastic  
40 particles, and increased mucus production [12]. Su *et al.* [13] exposed the coral symbiont,  
41 *Cladocopium goreau*, to 1-μm polystyrene spheres, leading to diminished detoxification activity,  
42 nutrient uptake, and photosynthesis, as well as increased oxidative stress, apoptosis levels, and ion  
43 transport. Plastic particles seem to negatively impact symbiotic relationships between corals and their

44 microalgae, thereby degrading the entire coral reef ecosystem, but this has not been systematically  
45 investigated.

46 Nanoplastics, particles smaller than 1  $\mu\text{m}$  [5], can originate by fragmentation of larger plastic  
47 objects through photochemical and mechanical degradation. There are also primary sources of  
48 nanoplastics. Medical and cosmetic products, nanofibers from clothes and carpets, 3D printing, and  
49 Styrofoam byproducts find their way into coral reef ecosystems via river drainages, sewage outfalls,  
50 and runoff after heavy rainfall, as well as via atmospheric input and ocean currents. Nanoplastic has  
51 recently been reported in ocean surface water samples [14].

52 In this study we focused on the microalgal symbionts of mollusks that inhabit fringing coral reefs  
53 of Okinawa. Knowledge of the effects of nanoplastic on the symbionts of Tridacninae (giant clams)  
54 and Fraginae (heart cockles) will benefit conservation and restocking efforts, as both are obligatory  
55 photo-symbionts and important contributors to coral reef ecosystems. Approximately 30  
56 Symbiodiniaceae phylotypes are economically important for fisheries [15]. This study specifically  
57 investigated effects of nanoplastic (42-nm polystyrene spheres) on the growth rates, aggregations,  
58 and gene expression changes in *Symbiodinium tridacnidorum* (symbionts of the Tridacninae) and  
59 *Cladocopium* sp. (symbionts of the Fraginae).

## 60 2. Materials and Methods

### 61 2.1. Exposure to nanoplastics using roller tanks

62 The majority of host animals obtain their indispensable symbiotic dinoflagellates from coral reef  
63 sand and the water column [16, 17]. Roller tanks and tables were used to simulate the natural  
64 environment of the dinoflagellate vegetative cells in their free-living state [18, 19]. Roller tanks have  
65 commonly been used to promote aggregation since Shanks and Edmondson [19, 20]. 15 roller  
66 tanks 13.4 cm in diameter and 7.5 cm in height with a capacity of 1,057 mL were employed. In tanks,  
67 aggregation can occur [19], ensuring that microalgae are exposed to the polystyrene nanoplastic  
68 (nanoPS) in a way that mimics their natural habitat. Once rotation commenced, continuous aggregate  
69 formation and suspension were ensured [20] as well as continuous exposure to nanoPS. Roller tanks  
70 are closed for the entire duration of the experiment, so that exposure levels of the nanoPS remain  
71 constant through-out. Tanks were closed without bubbles so as not to disturb the aggregation process  
72 with turbulence. To compare differences between species, two dinoflagellates, *Symbiodinium*  
73 *tridacnidorum* (clade A3 strain, ID: NIES-4076) and *Cladocopium* sp. (clade C strain, ID: NIES-4077)  
74 were cultured in artificial seawater containing 0.2x Guillard's (F/2) marine-water enrichment solution  
75 (Sigma-Aldrich) in roller tanks [21,22]. *S. tridacnidorum* and *Cladocopium* sp. (Clade C strain ID: NIES-  
76 4077) were isolated from *Tridacna crocea* and *Fragum* sp. in Okinawa, Japan [5]. Using glass flasks,  
77 precultures for the stress experiment were established, as previously described [4].

78 Microplastics (>1 mm) from coral reef and the ingestion (53 to 500  $\mu\text{m}$ ) by coral reef clams have  
79 been reported and microplastic removal by giant clams has been proposed [4, 23]. To simulate  
80 nanoplastic accumulation in coral reefs and in the host organisms, three different concentrations (0.01  
81 mg/L, 0.1 mg/L, and 10 mg/L) of nanoplastic (42-nm pristine polystyrene beads, nanoPS<sub>42</sub>, from Bangs  
82 Laboratories Inc., catalog number FSDG001, polystyrene density 1.05 g/cm<sup>3</sup>, nanoPS) were added to  
83 the treatment tanks (Tables S1). Treatment tanks as well as control tanks (no nanoPS) were  
84 established in triplicate. Three tanks without algae were prepared as negative controls (at 10 mg/L,

85 0.01 mg/L, 0 mg/L nanoplastic). In each culture tank, the final cell density of the two strains was  
86 adjusted to  $\sim 7 \times 10^5$  cells/mL. Tanks were harvested after 9-11 days, for logistical reasons, making  
87 replicates a day apart (Supplementary Table 2).

## 88 *2.2. Measurements of cell density and aggregation*

89 Cells for growth rates were counted using hemocytometers (C-Chip DHC-N01) under a Zeiss  
90 Axio Imager Z1 microscope (Jena, Germany). At least 2 subsamples and 200 cells were counted per  
91 sample.

92 Aggregates were imaged and counted in each tank and for five size classes, as follows: tiny: 0.2  
93 – 0.5 mm; small: 0.5 – 1 mm; medium: 1 – 2.5 mm; large: 2.5 – 3.5 mm; huge: > 3.5 mm in the longest  
94 dimension. Tanks of the same concentration were sampled at the same time of day. Controls were  
95 sampled first and then in order of increasing nanoPS<sub>42</sub> concentration to avoid nanoplastic carry over  
96 from higher concentrations to lower. In order to examine how nanoPS<sub>42</sub> affects aggregate formation,  
97 aggregates were collected for different measurements, after the approximate total number of  
98 aggregates in each tank had been determined. Aggregation of algae and plastic was confirmed with  
99 3D imaging using a Zeiss Lightsheet Z.1 and Imaris software. NanoPS<sub>42</sub> was observed with a BP filter  
100 (excitation: 405 nm; emission: 505-545 nm) and chloroplasts were visualized using a long-pass red  
101 filter (excitation: 488 nm, emission: 660 nm).

102 One fourth of all aggregates were collected for RNA analysis (2 min spin down at 12,000 rpm  
103 and discarding the supernatant, freezing in liquid nitrogen and storage at -80°C). For all other  
104 measured factors, harvest included separate sampling of the aggregate fraction (aggregates >0.5mm,  
105 Agg) and the surrounding sea water fraction (aggregates <0.5 mm and un-aggregated cells, SSW)  
106 [24]. Aggregates for sinking velocity (three aggregates per size class for 11.5 cm in a 100-mL glass  
107 graduated glassware cylinder) was collected in artificial seawater at the same temperature as  
108 experiments were conducted.

## 109 *2.3. RNA extraction, library construction, and sequencing*

110 Frozen cells were broken mechanically using a polytron (KINEMATICA Inc.) in tubes chilled with  
111 liquid nitrogen. RNAs were extracted using Trizol reagent (Invitrogen) according to the manufacturer's  
112 protocol. The quantity and quality of total RNA were checked using a Qubit fluorometer  
113 (ThermoFisher) and a TapeStation (Agilent) respectively. Libraries for RNA-seq were constructed  
114 using the NEBNext Ultra II Directional RNA Library Prep Kit for Illumina (#E7760, NEB). Sequencing  
115 was performed on a NovaSeq6000 SP platform. Nine mRNA-seq libraries from nanoPS-exposed  
116 photosymbiotic algae were sequenced (3 concentrations x 3 exposure times) plus three controls  
117 (Supplementary Table S2).

## 118 *2.4. RNA-seq data mapping and clustering analysis*

119 Raw sequencing data obtained from the NovaSeq6000 were quality trimmed with Trimmomatic  
120 (v0.32) in order to remove adapter sequences and low-quality reads. Paired reads that survived the  
121 trimming step (on average 92%) were mapped against reference transcripts of *Symbiodinium* and  
122 *Cladocopium* sp.. For each gene in the genomes of *Symbiodinium* and *Cladocopium* sp. a \*.t1  
123 transcript form was used as a reference sequence. Mapping was performed using RSEM [25] with

124 bowtie (v1.1.2) as an alignment tool. Expression values across all samples were normalized by the  
125 TMM method [26]. Genes with differential expression (2-fold difference and  $p < 0.001$ ) were identified  
126 with edgeR Bioconductor, based on the matrix of TMM normalized TPM values. Experimental samples  
127 were clustered according to their gene expression characteristics using edgeR. Annotations were  
128 performed using BLAST2GO and Pfam databases [21] and are available at the genome browser site  
129 (<https://marinegenomics.oist.jp>).

### 130 3. Results and Discussion

#### 131 3.1. *Suppression of algal growth by nanoplastic exposure*

132 Exposure to nanoPS<sub>42</sub> decreases the mean growth rate of photosymbiotic algae (see Figure 1). The  
133 greatest reduction in growth rate was seen at the lowest nanoPS<sub>42</sub> treatment (0.01 mg/L), with cell  
134 densities reduced from starting values by  $-0.062 \pm 0.02$  (Holm-Sidak,  $p = 0.002$ ); followed by the  
135 highest nanoPS<sub>42</sub> treatment (10 mg/L) with  $-0.013 \pm 0.05$  (Holm-Sidak,  $p = 0.026$ ). In the 0.1 mg/L  
136 treatment, cell densities increased slightly by  $0.028 \pm 0.04$ . Thus, nanoPS<sub>42</sub> either inhibited algal  
137 growth in a non-linear manner or had a limited effect [27]. Reductions in growth rates have also been  
138 reported in the  $\mu$ P study of [13] in *Cladocopium goreau* and in other microalgae exposed to  $\mu$ P  
139 (*Chlamydomonas reinhardtii* [28] and *Skeletonema costatum* [29]).

140 In addition, Su et al. [13] reported a reduction in cell size in *Cladocopium goreau*. Further  
141 investigations are needed to see if this is the case under nP exposure. Interesting to note is that the  
142 biggest growth rate reduction observed was at 0.01 mg/L nanoPS<sub>42</sub>, far below the 5 mg/L used by Su  
143 et al. [13]. The nutrient deficiency is also a reason discussed in (Long2017) which could explain the  
144 larger effects on growth rates at lower concentrations. The reason for nutrient limitation induced by  
145 plastic is proposed to be interactions of the nutrients with the surface of the plastics [30]. NanoPS<sub>42</sub>  
146 self-aggregation could account for the higher nanoPS<sub>42</sub> treatments having less effect on the growth  
147 rates.

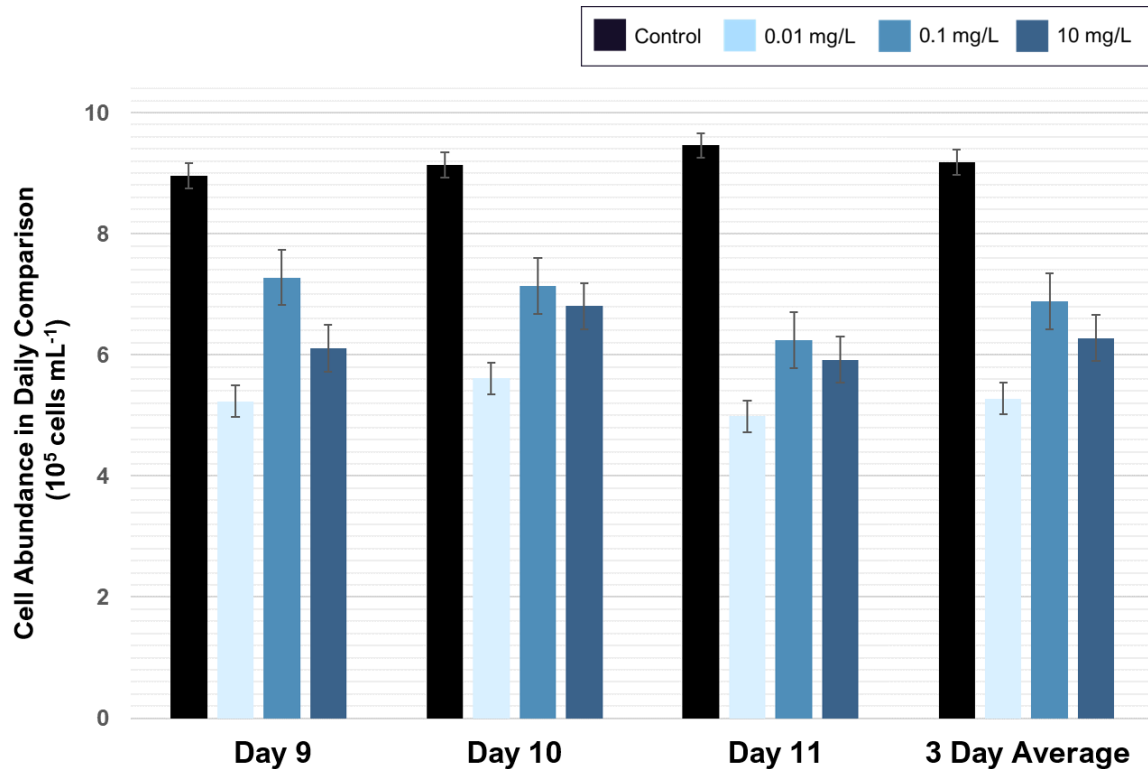

148

149

150

151

152

153

154

Figure 1. Treatment and control tanks were sampled after 9, 10, and 11 days. Experiments started with ~680,000 cells/mL in all tanks. There are differences between the growth rate in the different treatments, but the ratio stays the same over all three sampling days. The cell density in the control was  $9.83 \pm 0.39 \times 10^5$  cells per mL, while treatment tanks were significantly lower: 0.01 mg/mL:  $5.69 \pm 0.12 \times 10^5$  cells per mL; 0.1 mg/mL:  $7.51 \pm 0.34 \times 10^5$  cells per mL; 10 mg/mL:  $6.96 \pm 0.40 \times 10^5$  cells per mL. Bars display confidence interval.

155

### 3.2. Nanoplastic exposure influences the number and sinking velocity of cell aggregates

156

157

158

159

To understand the impact of nanoPS<sub>42</sub> on aggregation in these two Symbiodiniaceae cultures, the total number of algal aggregates per tank and in five aggregate size classes was recorded (Supplementary Figure S2). All tanks showed aggregation, which was expected, as self-aggregation of Symbiodiniaceae has been observed previously [13].

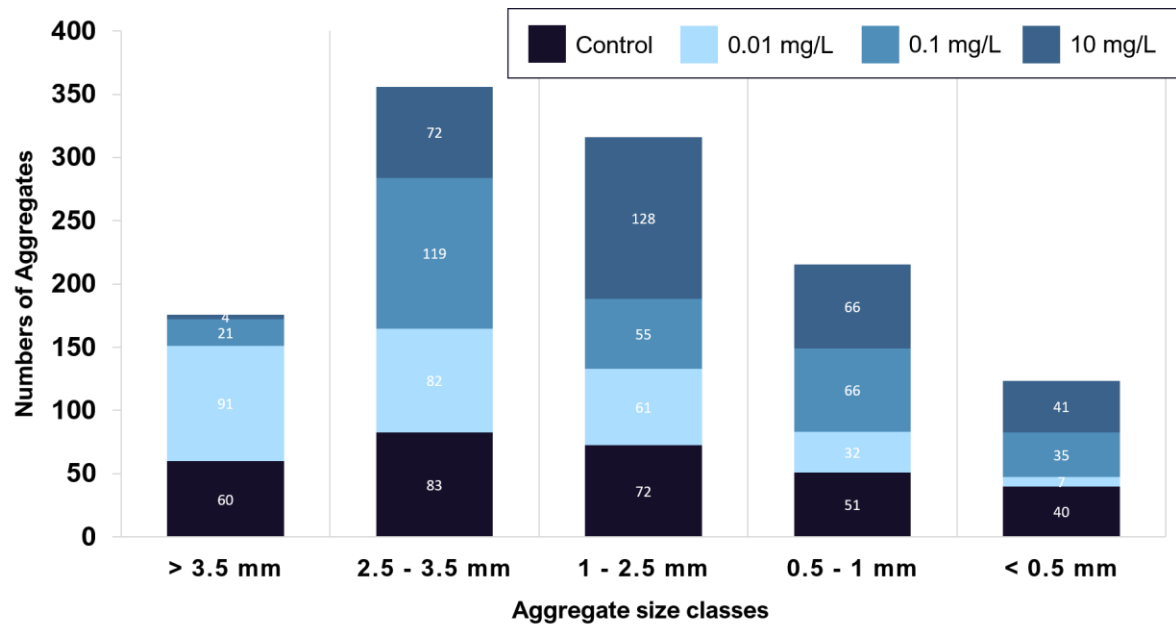

160

161 Figure 2. NanoPS exposure leads to change in aggregation. Aggregates sorted by size class show a significant  
162 change in distribution pattern under nanoPS exposure (Holm-Sidak,  $p = 0.05$ ). The number of aggregates are  
163 reduced by 10 % in the 0.01 mg/L treatment (Holm-Sidak,  $p=0.003$ ), but aggregation was enhanced overall in  
164 that treatment to have a higher percentage of huge aggregates than in the control treatment (Holm-Sidak,  $p =$   
165  $0.001$ ). In the higher plastic treatment at 10 mg/L this is reversed, leading to more aggregates overall, and more  
166 of those being of smaller sizes. No differences are observed when exposure length is compared.

167 The majority of aggregates exhibited an ovoid form. Significant difference can be observed when  
168 aggregate numbers are compared over all size classes and all treatments, showing that the nanoPS  
169 has an influence on the aggregation process. The lowest nanoPS treatments (0.01 mg/L) shows  
170 significant reduction in the total aggregates count by 10 % (Holm-Sidak,  $p = 0.003$ ). While there is  
171 also a reduction of 3 % in the intermediate nanoPS treatment (0.1 mg/L), this is not significant. The  
172 different aggregate sizes classes show significantly different distributions in all three treatments and  
173 the control (ANOVA,  $p < 0.001$ ) (Supplementary Figure S2). In the control, the self-aggregation led to  
174 a specific distribution pattern of aggregate sizes, which was not repeated in the treatments. Self-  
175 aggregation was also observed in the  $\mu\text{P}$  experiments of Su et al. [13]. The fact that presence of  
176 nanoPS changes the aggregation between the cells and leads to more aggregates in the bigger size  
177 classes is possible due to higher production of extracellular polymeric substances (EPS) with sticky  
178 properties, trapping more cells in one aggregate and keeping aggregates closer together. Nutrient  
179 depletion, which has been linked to the presence of  $\mu\text{P}$  in algae cultures [30], is associated with  
180 increased stickiness of the extracellular polymeric substances (EPS) [31,32]. Differences in the EPS  
181 production due to the presence of nanoPS is a likely factor contributing to the differences in  
182 aggregation seen in the study. EPS production was not measured, so further studies are needed to  
183 confirm this hypothesis linking the aggregation process and EPS production in Symbiodiniaceae  
184 under nanoPS influence. Lagarde et al. [28] notices different aggregate formation under different  
185 plastic treatment and sizes, which matches with our results.

186 Significant differences are evident when aggregate numbers are compared over size classes and  
187 treatments, showing that nanoPS influences aggregation. Aggregate size classes show significantly

188 different distributions in all three treatments vs. controls (ANOVA,  $p < 0.001$ ) (see Figure 2). These  
189 differences in aggregation could be due to changes of the cell surface receptors, as nanoPS increases  
190 genes related to those 2 fold (see Section NanoPS effects on gene expression).

191 Due to nanoPS exposure, aggregation and sinking velocities are impacted which in turn leads to  
192 change in sedimentation. As the majority of the host animals obtain their symbiotic dinoflagellates  
193 from the sand and water column [16], these changes in dinoflagellate sedimentation might lead to  
194 problems in acquisition of symbionts for the host animals. The lowest plastic treatment used, which is  
195 environmentally possible, already induces changes to the sedimentation. This lowest treatment led to  
196 bigger aggregates which at the same time sank faster, possibly removing the symbionts from the  
197 water column faster than required from the host animals and reducing chances of encountering  
198 symbionts.

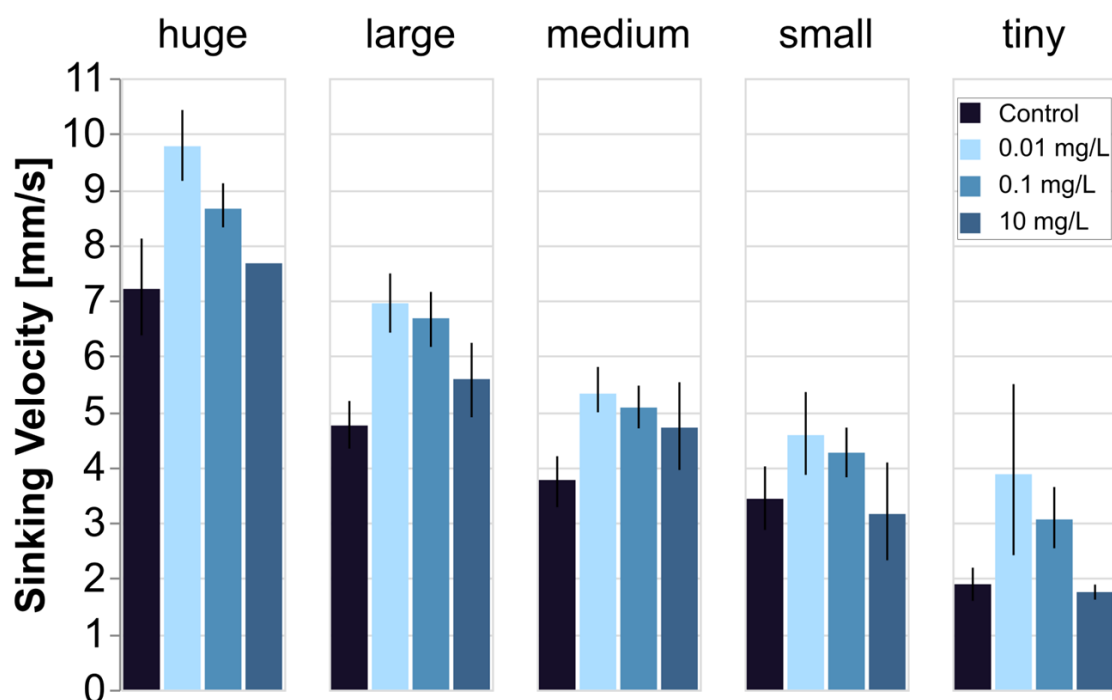

199

200 Figure 3. Sinking velocity change with nanoPS exposure. Sinking velocities decrease with aggregate size, from  
201 more than 7 mm/s (huge) to less than 2 mm/s (tiny). In all size classes, the control was similar in sinking velocity  
202 to the highest nanoPS treatment (10 mg/L). The low nanoPS treatment (0.01 mg/L) differed significantly from  
203 both controls (t-test, two-tailed  $p = 5.56 \times 10^{-4}$ ) and the highest nanoPS treatment (t-test, two-tailed  $p = 9.03 \times 10^{-4}$ ).  
204 This was also true for the intermediate nanoPS treatment (darker blue, 0.1 mg/L). Error bars are 95 %  
205 confidence intervals. Only one huge aggregate was measured in the highest nanoPS treatment. No differences  
206 in sinking velocity were observed in relation to exposure length.

207

208 Changes in aggregation and resulting sedimentation was observed under nanoPS exposure. It is  
209 interesting to see that the biggest changes in sinking velocity correspond to increases in aggregation  
210 and are observed in the lowest plastic treatment at 0.01 mg/L. On the other hand, the 10 mg/L  
211 treatment did not have any significant effect on the sinking rates but did affect sedimentation indirectly  
212 through changes in the aggregate size distribution (see Figure 2). These changes, both sinking  
213 velocities and aggregate sizes distribution, are most likely due to hetero-aggregation between algae  
214 and nanoPS. Under different treatments, the size distribution of aggregates was significantly different



215 (see Figure 2). In combination, it is likely that the same effect that led to that difference in aggregation  
216 is also responsible for the difference in sinking velocities. Changes in EPS production and stickiness  
217 will lead to different cell packaging within the aggregates, possibly creating tighter packed aggregates  
218 in the lowest and intermediate treatment. This effect might be counteracted under the highest nanoPS  
219 exposure, by the sheer volume of EPS, which is lighter than seawater (Mari2017). The nanoplastic  
220 itself trapped in these could also add to the sinking velocity returning back to control levels in the high  
221 plastic treatments. As these symbionts are paired with the mobile larvae of the host animals, a higher  
222 sinking velocity would remove the potential symbiont from the pelagic area and reduce the chance of  
223 a match.

### 224 3.3. NanoPS effects on gene expression

225 Analysis of differential gene expression showed that in *Symbiodinium*, 14 genes were  
226 upregulated after nanoPS<sub>42</sub> exposure, and 34 were downregulated relative to controls (Figure 2a). In  
227 *Cladocopium*, 75 genes were upregulated, and 169 genes were downregulated (Figure 2b).  
228 *Cladocopium* seems more sensitive to nanoPS<sub>42</sub> exposure, as overall more genes responded than in  
229 *Symbiodinium*. Since Pfam analysis had more annotations than BLAST2GO in DEGs of *Cladocopium*,  
230 we list the major domains encoded by the DEGs of *Cladocopium*. (Supplementary Tables S3-S6).

231 Table 1. Domains encoded by more than three up-regulated genes in *Cladocopium* sp.

| Domain name | Summary from Pfam database                                | Gene number |
|-------------|-----------------------------------------------------------|-------------|
| AAA_5       | AAA domain (dynein-related subfamily)                     | 6           |
| DHC_N2      | Dynein heavy chain, N-terminal region 2                   | 5           |
| AAA         | ATPase family associated with various cellular activities | 4           |
| AAA_6       | Hydrolytic ATP binding site of dynein motor region        | 4           |
| TIG         | IPT/TIG domain                                            | 4           |

232  
233 The largest group of upregulated genes was a subfamily of dynein-related proteins having an  
234 AAA\_5 domain (Table 1). Dynein is a microtubule-associated motor protein. Ten genes for dynein-  
235 related proteins with AAA and/or DHC (Dynein heavy chain) were upregulated in *Cladocopium* by  
236 nanoPS<sub>42</sub> (Table 1, Supplementary Table S4). It has been shown that microplastic exposure induces  
237 production of reactive oxygen species (ROS) in microalgae [13,28] and dynein upregulation,  
238 therefore, it might be needed to balance cytoskeletal dynamics as microtubule polymerization is  
239 impaired by oxidative stress [33]. Interestingly, dynein light chain genes were also shown to be  
240 upregulated in gill cells of zebra mussels exposed to polystyrene microplastic [34].

241 Four upregulated genes in *Cladocopium* (Table 1) encoded proteins with TIG domains that have  
242 an immunoglobulin-like fold and are found in cell surface receptors that control cell dissociation  
243 [35,36]. This might contribute to adhesion between neighboring cells and to the extracellular matrix  
244 composition, and explain some of the changes observed in cell aggregations.

245 There were more downregulated genes than upregulated genes in both *Symbiodinium* and  
246 *Cladocopium* (Figure 2). PPR (pentatricopeptide repeat) protein (Table 2) is involved in RNA editing  
247 [36] and extensive RNA editing has been reported in organelles of Symbiodiniaceae [37,38]. Five



248 genes for photosynthesis were downregulated (Figure 2). These changes may explain observed  
 249 reductions in photosystem efficiency in *C. goreau* [13].

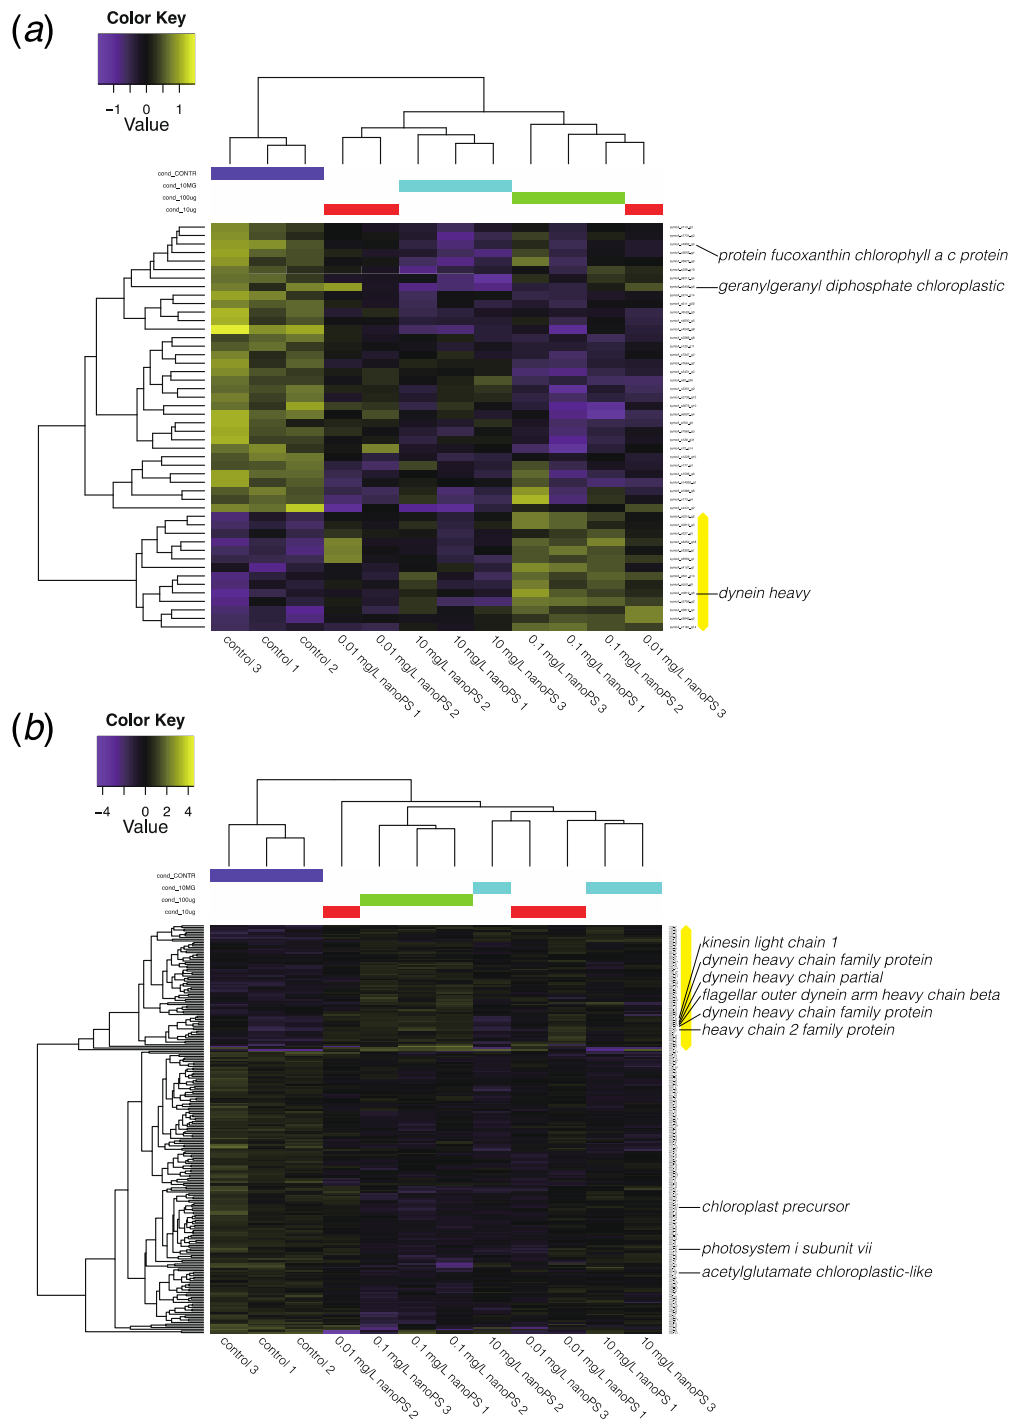

250

251 Figure 4. Heatmap and clustering of differentially expressed genes (2-fold changes,  $P < 0.001$ ) between  
 252 dinoflagellates exposed to nanoplastics and controls. (a) DEGs in *Symbiodinium tridacnidorum*. (b) DEGs in  
 253 *Cladocopium* sp. Values indicate the relative gene expression level, with purple and yellow showing

254 downregulation and upregulation, respectively. The yellow bar shows a cluster of upregulated genes.  
255 Annotations by Blast2GO show the presence of microtubule- or photosynthesis-related genes among DEGs.

256 Table 2. Domains encoded by more than three down-regulated genes in *Cladocopium* sp.

| Domain name      | Summary from Pfam database                          | Gene number |
|------------------|-----------------------------------------------------|-------------|
| Ank              | Ankyrin repeat                                      | 10          |
| Ank_2            | Ankyrin repeats (3 copies)                          | 10          |
| Ank_3            | Ankyrin repeat                                      | 10          |
| Ank_4            | Ankyrin repeats (many copies)                       | 10          |
| Ank_5            | Ankyrin repeats (many copies)                       | 10          |
| PPR_2            | PPR repeat family                                   | 6           |
| RCC1_2           | Regulator of chromosome condensation (RCC1) repeat  | 6           |
| ANAPC3<br>(Apc3) | Anaphase-promoting complex, cyclosome, subunit 3    | 5           |
| Pkinase          | Protein kinase domain                               | 5           |
| PPR              | PPR repeat                                          | 5           |
| PPR_3            | Pentatricopeptide repeat domain                     | 5           |
| Abhydrolase_5    | Alpha/beta hydrolase family                         | 4           |
| Abhydrolase_6    | Alpha/beta hydrolase family                         | 4           |
| Lipase_3         | Lipase (class 3)                                    | 4           |
| PPR_1            | PPR repeat                                          | 4           |
| TPR_14           | Tetratricopeptide repeat                            | 4           |
| YukD             | WXG100 protein secretion system (Wss), protein YukD | 4           |

257  
258 Other downregulated gene groups were related to intracellular degradation processes, including  
259 hydrolase and lipase, and to subunit 3 of the anaphase-promoting complex/cyclosome [40]. The  
260 downregulated gene (s3282\_g2) with abhydrolase and chlorophyllase domains is likely related to  
261 chlorophyll degradation [41]. The gene, s576\_g21, for cell division control (CDC) protein 2 is  
262 downregulated in *Cladocopium*. Downregulation of six genes with RCC1 (regulator of chromosome  
263 condensation) and three genes with CDC domains suggest some effect on cell division. Thus, several  
264 negative consequences of nanoPS<sub>42</sub> exposure are suggested by DEGs (summarized in  
265 Supplementary Figure S4).

#### 266 4. Conclusions

267 Previous studies have shown that nanoplastic has adverse effects on different algae groups  
268 [27,29,30,42,43], and a recent study shows that microplastic has similarly negative effects on an  
269 endosymbiotic dinoflagellate *Cladocopium goreau* [13]. No previous studies have been conducted  
270 on nanoPS<sub>42</sub> effects on Symbiodiniaceae. We found significant changes in aggregation and aggregate  
271 sinking velocity of *Symbiodinium tridacnidorum* and *Cladocopium* sp., coupled with variations in gene  
272 expression patterns after exposure to nanoPS<sub>42</sub>. This suggests that nanoPS<sub>42</sub> in coral reef ecosystems  
273 has the potential to influence the acquisition of symbionts by mollusks and corals, likely damaging

274 these symbiotic relationships. Since both are major architects of reef structure, nanoPS<sub>42</sub> pollution  
275 has the potential to lead to structural changes in reef ecosystem dynamics.  
276

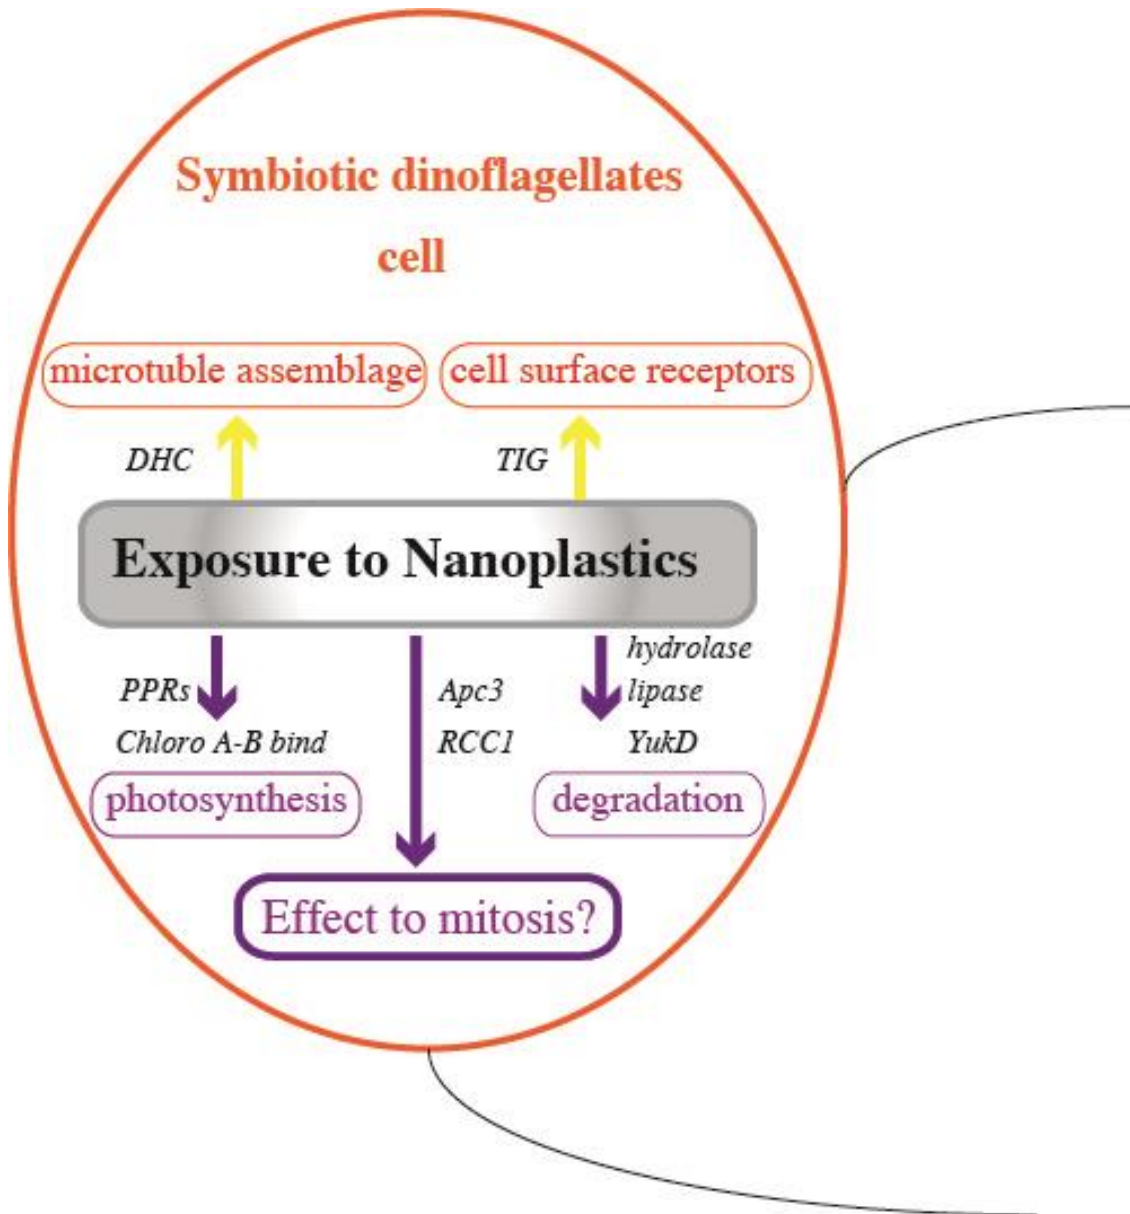

277

278 Figure 5. Exposure to nanoPS<sub>42</sub> changes gene expression levels in symbiotic dinoflagellates. Yellow and  
279 purple arrows show up-regulation and down-regulation of gene expression, respectively.

280 Supplementary Materials: The following are available online at [www.mdpi.com/xxx/s1](http://www.mdpi.com/xxx/s1); Figure S1: Cell abundance  
281 in treatment tanks, control tanks, and outside controls; Figure S2: NanoPS exposure changes aggregation  
282 behaviour, reduces cell numbers, and alters size class distributions; Table S1: Relationship between nanoPS<sub>42</sub>  
283 concentration and particles per Tank; Table S2: Sampling days of each tank; Table S3: Genes that responded to  
284 nanoplastic exposure in *Symbiodinium tridacnidorum*; Table S4: Genes that responded to nanoplastic exposure  
285 in *Cladocopium* sp.

286 Author Contributions: CR designed the study and performed the experiment. ES carried out RNA analyses. KK  
287 and CR performed RNA-seq mapping and cluster analyses. All authors wrote the manuscript. All authors have  
288 read and agreed to the published version of the manuscript.

289 Funding: This research received no external funding. This research was funded by OIST support for the Light-  
290 Matter Interactions for Quantum Technologies (SNC) and the Marine Genomics Unit (NS).

291 Acknowledgments: We are grateful to the DNA sequencing section of OIST for RNA preparation and sequencing  
292 and to the OIST imaging section for 3D image support. We thank members of the MGU, especially Ms. Haruhi  
293 Narisoko for cell culturing and Ms. Kanako Hisata for IT support. We are grateful for the help and support provided  
294 by Dr. K. Deasy from the Engineering Support Section of Research Support Division at OIST. We gratefully  
295 acknowledge Profs. Síle Nic Chormaic and Noriyuki Satoh for their continuing personal and material support and  
296 kind encouragement throughout the project.

297 Conflicts of Interest: The authors declare no conflict of interest.

298 Availability of Data: Data are available in the electronic supplementary material. Raw sequence data are available  
299 from PRJNA627564 in NCBI database. *Symbiodinium* (currently the family Symbiodiniaceae) clade A3 and C  
300 genomes: clade A3 ([https://marinegenomics.oist.jp/symb/viewer/info?project\\_id=37](https://marinegenomics.oist.jp/symb/viewer/info?project_id=37)) clade C  
301 ([https://marinegenomics.oist.jp/symb/viewer/info?project\\_id=40](https://marinegenomics.oist.jp/symb/viewer/info?project_id=40)) Transcript models of *Symbiodinium* clades A3  
302 and C: [https://marinegenomics.oist.jp/symb/download/syma\\_transcriptome\\_37.fasta.gz](https://marinegenomics.oist.jp/symb/download/syma_transcriptome_37.fasta.gz)  
303 [https://marinegenomics.oist.jp/symb/download/symC\\_aug\\_40.fa.gz](https://marinegenomics.oist.jp/symb/download/symC_aug_40.fa.gz)

304

## 305 References

- 306 1. McKinney ML. 1998 Is Marine Biodiversity at Less Risk? Evidence and  
307 Implications. *Diversity and Distributions* 4, 3–8.
- 308 2. Hughes TP *et al.* 2018 Spatial and temporal patterns of mass bleaching of corals in the  
309 Anthropocene. *Science* 359, 80–83.
- 310 3. Woodhead AJ, Hicks CC, Norström AV, Williams GJ, Graham NAJ. 2019 Coral reef  
311 ecosystem services in the Anthropocene. *Funct. Ecol.* , 33(6), 1023–1034.
- 312 4. Imhof, H. K., Sigl, R., Brauer, E., Feyl, S., Giesemann, P., Klink, S., Leupolz, K., Löder, M. G.  
313 J., Löschel, L. A., Missun, J., Muszynski, S., Ramsperger, A. F. R. M., Schrank, I., Speck, S.,  
314 Steibl, S., Trotter, B., Winter, I., & Laforsch, C. (2017). Spatial and temporal variation of  
315 macro-, meso- and microplastic abundance on a remote coral island of the Maldives, Indian  
316 Ocean. *Marine Pollution Bulletin*, 116(1–2), 340–347.
- 317 5. Gillibert, R., Balakrishnan, G., Deshoules, Q., Tardivel, M., Magazzù, A., Donato, M. G.,  
318 Maragò, O. M., Lamy De La Chapelle, M., Colas, F., Lagarde, F., & Gucciardi, P. G. 2019.  
319 Raman tweezers for small microplastics and nanoplastics identification in seawater. *Environ.*  
320 *Sci. Technol.*, 53(15), 9003–9013.
- 321 6. Tang J, Ni X, Zhou Z, Wang L, Lin S. 2018 Acute microplastic exposure raises stress  
322 response and suppresses detoxification and immune capacities in the scleractinian coral  
323 *Pocillopora damicornis*. *Environ. Pollut.* 243, 66–74.
- 324 7. Hall NM, Berry KLE, Rintoul L, Hoogenboom MO. 2015 Microplastic ingestion by  
325 scleractinian corals. *Mar. Biol.* 162, 725–732.
- 326 8. Connors, E. J. 2017. Distribution and biological implications of plastic pollution on the  
327 fringing reef of Mo’orea, French Polynesia. *PeerJ*, (8), e3733.
- 328 9. Axworthy JB, Padilla-Gamiño JL. 2019 Microplastics ingestion and heterotrophy in thermally  
329 stressed corals. *Sci. Rep.* 9, 18193.
- 330 10. Okubo N, Takahashi S, Nakano Y. 2018 Microplastics disturb the anthozoan-algae symbiotic  
331 relationship. *Mar. Pollut. Bull.* 135, 83–89.
- 332 11. Hankins C, Duffy A, Drisco K. 2018 Scleractinian coral microplastic ingestion: Potential  
333 calcification effects, size limits, and retention. *Mar. Pollut. Bull.* 135, 587–593.
- 334 12. Reichert J, Schellenberg J, Schubert P, Wilke T. 2018 Responses of reef building corals to  
335 microplastic exposure. *Environ. Pollut.* 237, 955–960.

- 336 13. Su Y, Zhang K, Zhou Z, Wang J, Yang X, Tang J, Li H, Lin S. 2020 Microplastic exposure  
337 represses the growth of endosymbiotic dinoflagellate *Cladocopium goreau* in culture  
338 through affecting its apoptosis and metabolism. *Chemosphere* 244, 125485.
- 339 14. Ter Halle A, Jeanneau L, Martignac M, Jardé E, Pedrono B, Brach L, Gigault J. 2017  
340 Nanoplastic in the North Atlantic Subtropical Gyre. *Environ. Sci. Technol.* 51, 13689–13697.
- 341 15. Mies, M., Braga, F., Scozzafave, M. S., de Lemos, D. E. L., & Sumida, P. Y. G. (2012). Early  
342 development, survival and growth rates of the giant clam *Tridacna crocea* (Bivalvia:  
343 Tridacnidae). *Brazilian Journal of Oceanography*, 60(2), 127–133.
- 344 16. Hirose, M., Reimer, J. D., Hidaka, M., & Suda, S. (2008). Phylogenetic analyses of potentially  
345 free-living Symbiodinium spp. isolated from coral reef sand in Okinawa, Japan. *Marine*  
346 *Biology*, 155(1), 105–112.
- 347 17. Yamashita, H., & Koike, K. (2013). Genetic identity of free-living Symbiodinium obtained  
348 over a broad latitudinal range in the Japanese coast. *Phycological Research*, 61(1), 68–80.
- 349 18. Schoenberg, D. A., & Trench, R. K. (1980). Genetic variation in Symbiodinium  
350 (=Gymnodinium) microadriaticum Freudenthal, and specificity in its symbiosis with marine  
351 invertebrates. I. Isoenzyme and soluble protein patterns of axenic cultures of Symbiodinium  
352 microadriaticum. *Proceedings of the Royal Society of London - Biological Sciences*,  
353 207(1169), 405–427.
- 354 19. Long M, Moriceau B, Gallinari M, Lambert C, Huvet A, Raffray J, Soudant P. 2015  
355 Interactions between microplastics and phytoplankton aggregates: Impact on their  
356 respective fates. *Mar. Chem.* 175, 39–46.
- 357 20. Shanks, A. L., & Edmondson, E. W. (1989). Laboratory-made artificial marine snow: a  
358 biological model of the real thing. *Marine Biology*, 101(4), 463–470.
- 359 21. Shoguchi E *et al.* 2018 Two divergent Symbiodinium genomes reveal conservation of a  
360 gene cluster for sunscreen biosynthesis and recently lost genes. *BMC Genomics* 19, 458.
- 361 22. Beedessee G, Hisata K, Roy MC, Van Dolah FM, Satoh N, Shoguchi E. 2019 Diversified  
362 secondary metabolite biosynthesis gene repertoire revealed in symbiotic  
363 dinoflagellates. *Sci. Rep.* 9, 1204.
- 364 23. Arossa, S., Martin, C., Rossbach, S., & Duarte, C. M. (2019). Microplastic removal by Red  
365 Sea giant clam (*Tridacna maxima*). *Environmental Pollution*, 252, 1257–1266.
- 366 24. Passow, U., Sweet, J., Francis, S., Xu, C., Dissanayake, A., Lin, Y., Santschi, P., & Quigg, A.  
367 (2019). Incorporation of oil into diatom aggregates. *Marine Ecology Progress Series*, 612,  
368 65–86.
- 369 25. Li B, Dewey CN. 2011 RSEM: accurate transcript quantification from RNA-Seq data with or  
370 without a reference genome. *BMC Bioinformatics* 12, 323.
- 371 26. Robinson MD, Oshlack A. 2010 A scaling normalization method for differential expression  
372 analysis of RNA-seq data. *Genome Biol.* 11, R25.
- 373 27. Prata, J. C., Lavorante, B. R. B. O., Maria da, M. da C., & Guilhermino, L. (2018). Influence of  
374 microplastics on the toxicity of the pharmaceuticals procainamide and doxycycline on the  
375 marine microalgae *Tetraselmis chuii*. *Aquatic Toxicology*, 197, 143–152.
- 376 28. Lagarde F, Olivier O, Zanella M, Daniel P, Hiard S, Caruso A. 2016 Microplastic interactions  
377 with freshwater microalgae: Hetero-aggregation and changes in plastic density appear  
378 strongly dependent on polymer type. *Environ. Pollut.* 215, 331–339.



- 379 29. Zhang C, Chen X, Wang J, Tan L. 2017 Toxic effects of microplastic on marine microalgae  
380 *Skeletonema costatum*: Interactions between microplastic and algae. *Environ. Pollut.* 220,  
381 1282–1288.
- 382 30. Nolte TM, Hartmann NB, Kleijn JM, Garnæs J, van de Meent D, Jan Hendriks A, Baun A.  
383 2017 The toxicity of plastic nanoparticles to green algae as influenced by surface  
384 modification, medium hardness and cellular adsorption. *Aquat. Toxicol.* 183, 11–20.
- 385 31. Logan, B. E., & Alldredge, A. L. (1989). Potential for increased nutrient uptake by  
386 flocculating diatoms. *Marine Biology*, 101(4), 443–450.
- 387 32. Kiørboe, T., Andersen, K. P., & Dam, H. G. (1990). Coagulation efficiency and aggregate  
388 formation in marine phytoplankton. *Marine Biology*, 107(2), 235–245.
- 389 33. Wilson, C., & González-Billault, C. (2015). Regulation of cytoskeletal dynamics by redox  
390 signaling and oxidative stress: Implications for neuronal development and trafficking.  
391 *Frontiers in Cellular Neuroscience*, 9, 1–10.
- 392 34. Magni S, Della Torre C, Garrone G, D'Amato A, Parenti CC, Binelli A. 2019 First evidence of  
393 protein modulation by polystyrene microplastics in a freshwater biological model. *Environ.*  
394 *Pollut.* 250, 407–415
- 395 35. Collesi, C., Santoro, M. M., Gaudino, G., & Comoglio, P. M. (1996). A splicing variant of the  
396 RON transcript induces constitutive tyrosine kinase activity and an invasive phenotype.  
397 *Molecular and Cellular Biology*, 16(10), 5518–5526.
- 398 36. Bork P, Doerks T, Springer TA, Snel B. 1999 Domains in plexins: links to integrins and  
399 transcription factors. *Trends Biochem. Sci.* 24, 261–263.
- 400 37. Barkan A, Walker M, Nolasco M, Johnson D. 1994 A nuclear mutation in maize blocks the  
401 processing and translation of several chloroplast mRNAs and provides evidence for the  
402 differential translation of alternative mRNA forms. *EMBO J.* 13, 3170–3181.
- 403 38. Mungpakdee S *et al.* 2014 Massive Gene Transfer and Extensive RNA Editing of a  
404 Symbiotic Dinoflagellate Plastid Genome. *Genome Biol. Evol.* 6, 1408–1422.
- 405 39. Shoguchi E, Shinzato C, Hisata K, Satoh N, Mungpakdee S. 2015 The Large Mitochondrial  
406 Genome of *Symbiodinium minutum* Reveals Conserved Noncoding Sequences between  
407 Dinoflagellates and Apicomplexans. *Genome Biol. Evol.* 7, 2237–2244
- 408 40. Peters J-M. 2006 The anaphase promoting complex/cyclosome: a machine designed to  
409 destroy. *Nat. Rev. Mol. Cell Biol.* 7, 644–656.
- 410 41. Tsuchiya, T., Ohta, H., Okawa, K., Iwamatsu, A., Shimada, H., Masuda, T., & Takamiya, K. I.  
411 (1999). Cloning of chlorophyllase, the key enzyme in chlorophyll degradation: Finding of a  
412 lipase motif and the induction by methyl jasmonate. *Proceedings of the National Academy*  
413 *of Sciences of the United States of America*, 96(26),
- 414 42. Besseling, E., Wang, B., Luerling, M., Koelmans, A. A., Lürling, M., & Koelmans, A. A. (2014).  
415 Nanoplastic affects growth of *S. obliquus* and reproduction of *D. magna* *Environ. Sci.*  
416 *Technol.*, 48(20), 12336–12343.
- 417 43. Bellingeri A, Casabianca S, Capellacci S, Faleri C, Paccagnini E, Lupetti P, Koelmans AA,  
418 Penna A, Corsi I. 2020 Impact of polystyrene nanoparticles on marine diatom *Skeletonema*  
419 *marinoi* chain assemblages and consequences on their ecological role in marine  
420 ecosystems. *Environ. Pollut.* 262, 114268.



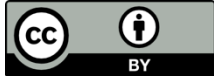

© 2020 by the authors. Submitted for possible open access publication under the terms and conditions of the Creative Commons Attribution (CC BY) license (<http://creativecommons.org/licenses/by/4.0/>).
